# Supplementary material for: Anti-High Mobility Group Box 1 Neutralizing-Antibody Ameliorates Dextran Sodium Sulfate Colitis in Mice
Source: PubMed Central journal article supplement (PMC7661783; doi:10.3389/fimmu.2020.585094), 2020-10-30
Supplement: DataSheet_1.pdf [file DataSheet_1.pdf]

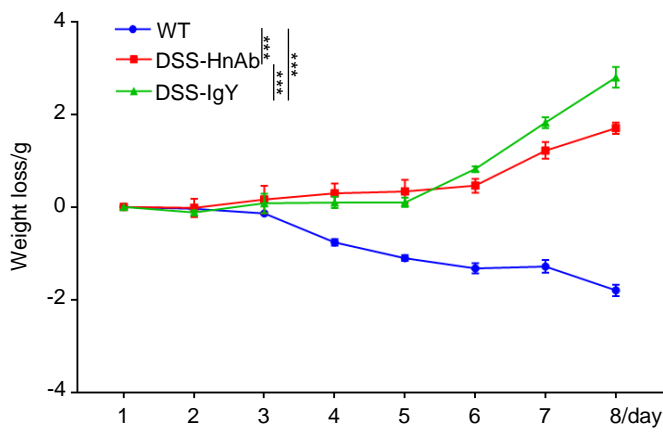

**Supplementary Figure 1. Body weight loss is decreased after HnAb treatment.** The body weight loss gradually increased from Day 6 onward in the HnAb-treated and IgY treated DSS-induced colitis mice. An obvious increase in body weight loss was observed both in the HnAb treated and IgY treated DSS-induced colitis mice comparing to the control at Day 8. Data were presented as mean  $\pm$  SEM of 5 independent experiments. \*\*\* $P$ <0.001, by two-way ANOVA with Tukey's post-test.
