# Supplementary material for: Anti-High Mobility Group Box 1 Neutralizing-Antibody Ameliorates Dextran Sodium Sulfate Colitis in Mice
Source: PubMed Central journal article supplement (PMC7661783; doi:10.3389/fimmu.2020.585094), 2020-10-30
Supplement: DataSheet_2.pdf [file DataSheet_2.pdf]

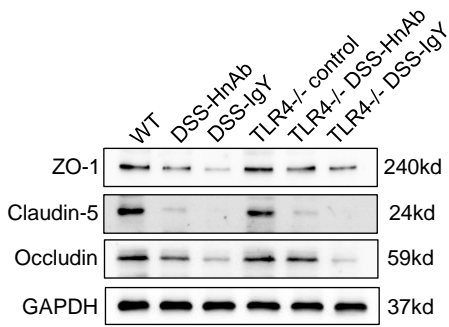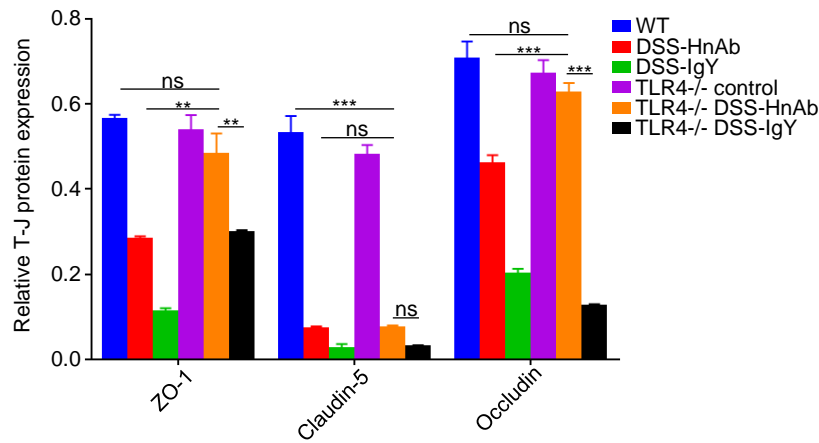

**Supplementary Figure 2. Tight junction integrity of mucosal barrier is rescued due to HnAb treatment in TLR4<sup>-/-</sup> mouse model of colitis.** The protein expression levels of ZO-1 ( $P<0.001$ ) and occludin ( $P<0.001$ ), but not claudin-5 ( $P=0.241$ ), were significantly higher in colonic tissues of HnAb-treated DSS-induced TLR4<sup>-/-</sup> mice than IgY-treated DSS-induced TLR4<sup>-/-</sup> mice. A significant difference of protein expression was found in terms of claudin-5, but not ZO-1 and occluding, between DSS-treated TLR4<sup>-/-</sup> mice by HnAb application and normal control WT mice. Data were presented as mean  $\pm$  SEM of 5 independent experiments. \*\* $P<0.01$ , \*\*\* $P<0.001$ , ns, not significant, by one-way ANOVA with Tukey's post-test.
