# Supplementary material for: Anti-High Mobility Group Box 1 Neutralizing-Antibody Ameliorates Dextran Sodium Sulfate Colitis in Mice
Source: PubMed Central journal article supplement (PMC7661783; doi:10.3389/fimmu.2020.585094), 2020-10-30
Supplement: DataSheet_3.pdf [file DataSheet_3.pdf]

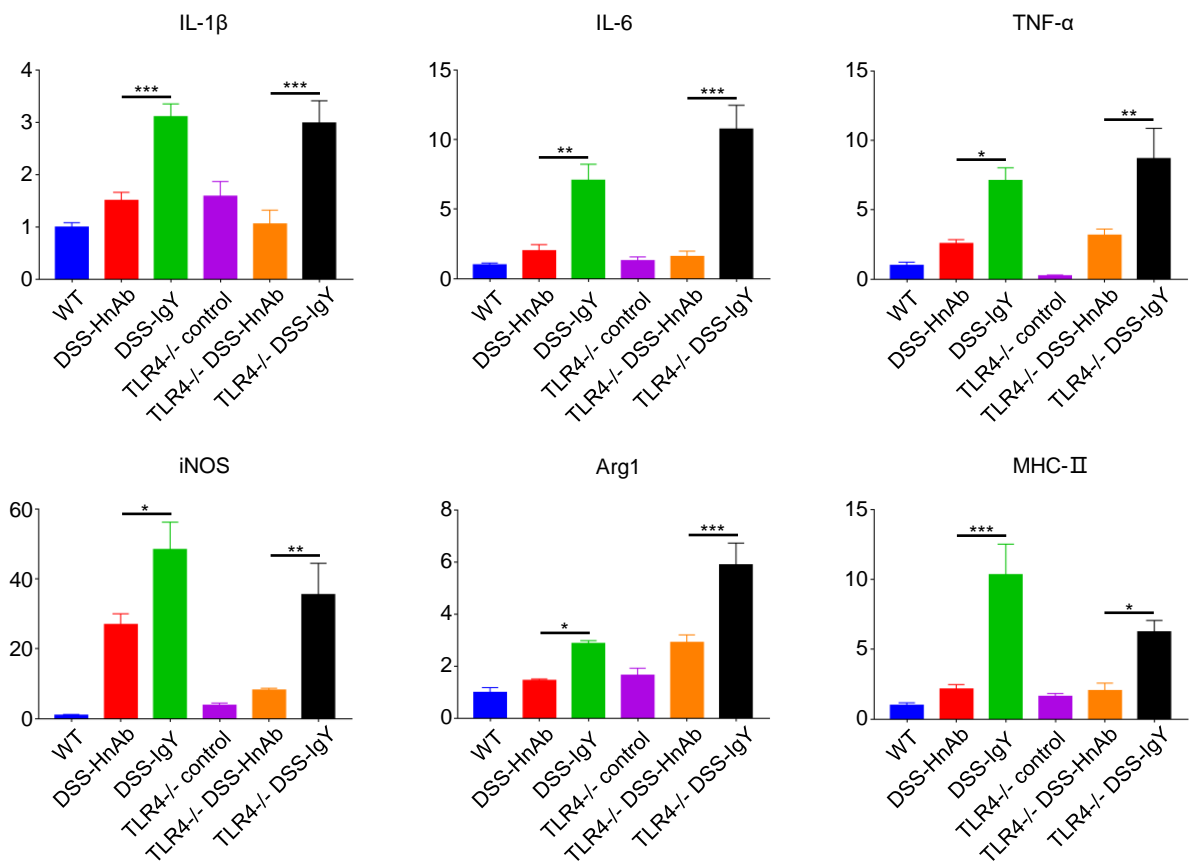

**Supplementary Figure 3. TLR4 deficiency and HnAb treatment have an effect in activation of macrophages.** The expression of M1/M2 markers iNOS, Arg1, MHC-II and the pro-inflammatory cytokines TNF- $\alpha$ , IL-6, IL-1 $\beta$  was measured in colonic tissues by RT-PCR. Significant decrease mRNA expression levels for iNOS, Arg1, MHC-II, TNF- $\alpha$ , IL-6, IL-1 $\beta$  were found when HnAb treatment comparing to IgY treatment in DSS-induced colitis TLR4 $^{-/-}$  mice or wild-type mice. Data were presented as mean  $\pm$  SEM of 5 independent experiments. \* $P$ <0.05, \*\* $P$ <0.01, \*\*\* $P$ <0.001, by one-way ANOVA with Tukey's post-test.
