# Supplementary material for: Anti-High Mobility Group Box 1 Neutralizing-Antibody Ameliorates Dextran Sodium Sulfate Colitis in Mice
Source: PubMed Central journal article supplement (PMC7661783; doi:10.3389/fimmu.2020.585094), 2020-10-30
Supplement: DataSheet_4.pdf [file DataSheet_4.pdf]

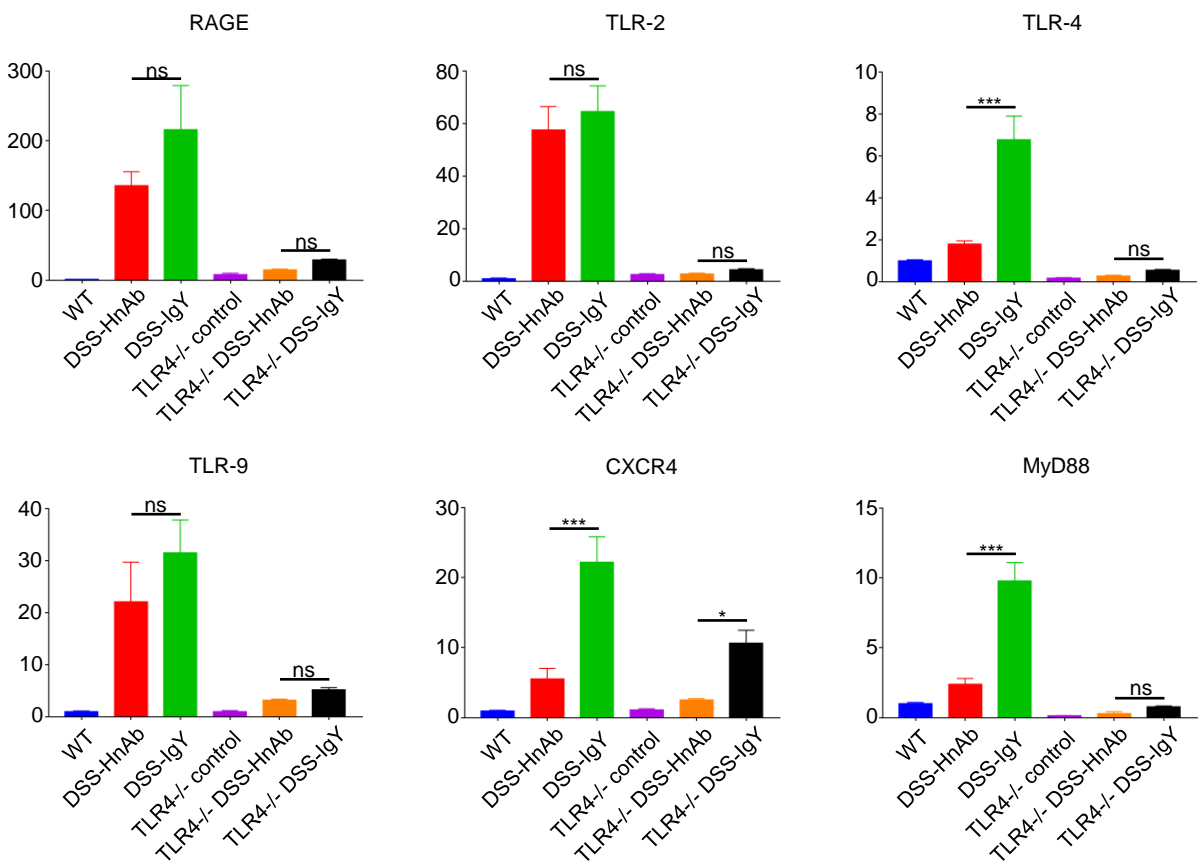

**Supplementary Figure 4. TLR4 deficiency and HnAb treatment have a different effect in the pathway of HMGB1 in DSS-induced colitis.** Significant decrease for TLR4, MyD88 and CXCL4 mRNA, but not for RAGE, TLR2 and TLR9 when HnAb treatment comparing to IgY treatment in DSS-induced colitis TLR4<sup>-/-</sup> mice. Data were presented as mean ± SEM of 5 independent experiments. \**P*<0.05, \*\*\**P*<0.001, ns, not significant, by one-way ANOVA with Tukey's post-test.
