# Supplementary material for: Anti-High Mobility Group Box 1 Neutralizing-Antibody Ameliorates Dextran Sodium Sulfate Colitis in Mice
Source: PubMed Central journal article supplement (PMC7661783; doi:10.3389/fimmu.2020.585094), 2020-10-30
Supplement: DataSheet_5.pdf [file DataSheet_5.pdf]

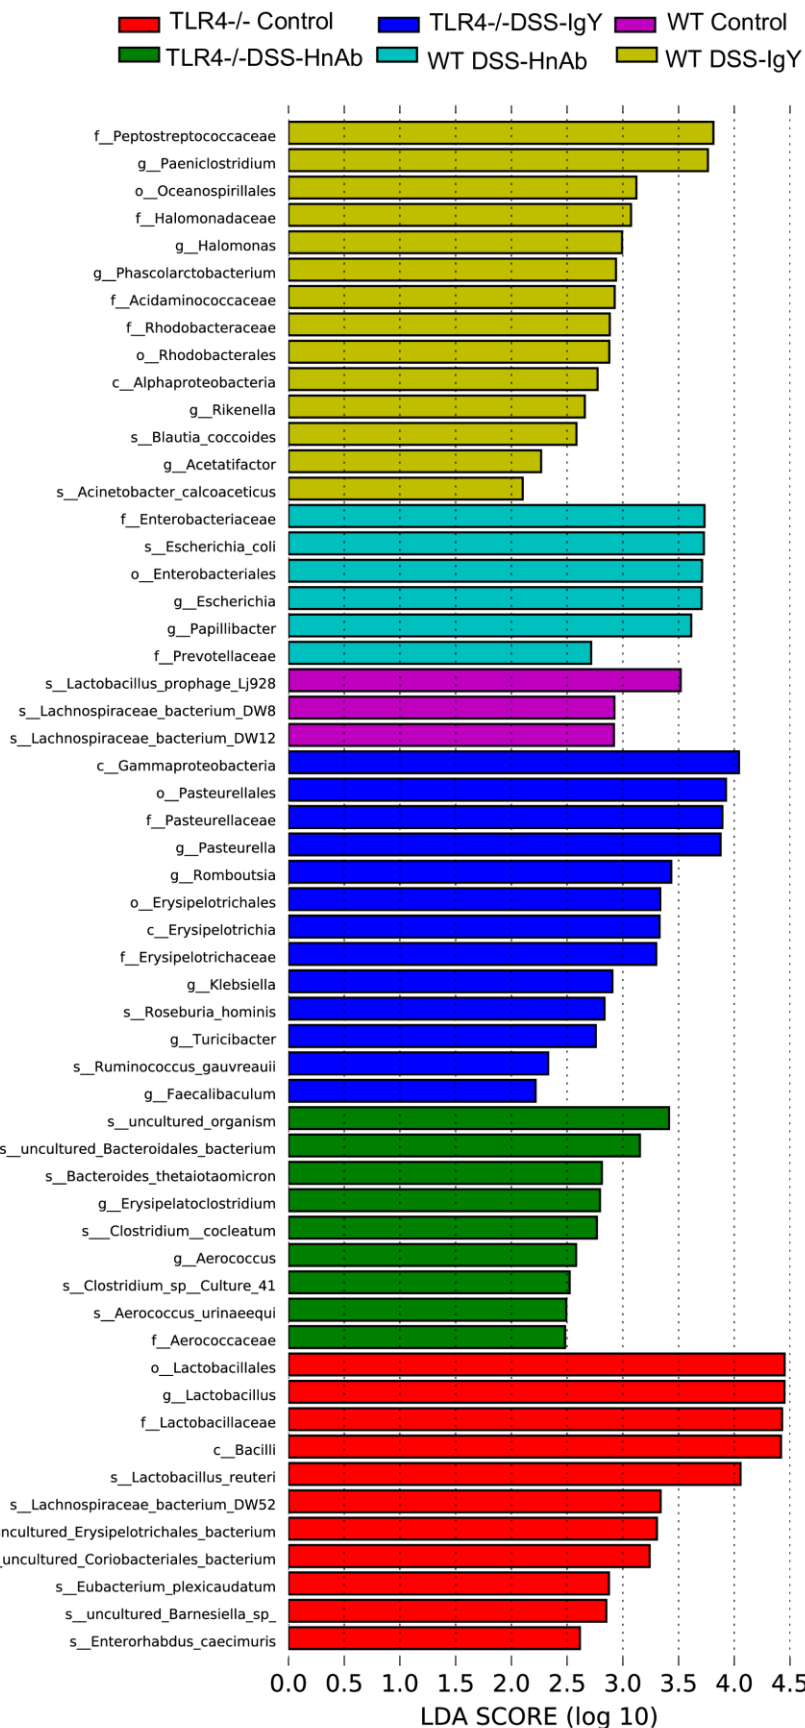

**Supplementary Figure 5. Microbiota changes are partially reserved by HnAb treatment in DSS-treated mice using LEfSe.** Discriminative features chart based on an effect size cutoff of 2.0 for the logarithmic LDA score were plotted. The dominating taxa in WT group were enriched in *Lactobacillus* at the genus level, which decreased after DSS administration. And the changes were partially reversed by HnAb treatment. Meanwhile, TLR4 deficiency decreased the abundance of *Bacteroides*, *Helicobacter*, *Ruminiclostridium* and increased the abundance of *Lactobacillus* compared to corresponding WT group.
